# Supplementary material for: Studying the Function of Phytoplasma Effector Proteins Using a Chemical-Inducible Expression System in Transgenic Plants
Source: MDPI journal article supplement (doi:10.3390/ijms222413582), 2021-12-18
Supplement: s1 [file s1]

**Table S1:** Coding sequences of the secreted part of *Ca. P. asteris* strain AY-WB *SAP54* (CP000061.1, AYWB\_224), *SAP11* (CP000061.1, AYWB\_370), and strain OY-M *TENGU* (AB750355.1), codon optimized for *E. coli*, the coding sequence of *mGFP6* as PCR amplified from the plasmid pGreenII-35::mGFP6 (Hellens et al., 1999) and coding sequences of the fusion genes mGFP6-SAP54, mGFP6-SAP11, and mGFP6-TENGU.

>SAP54

ATGGACAAAGACATCGCTTCTACCTCTAACAACAACCCGAACATCACCAACTACTCTATCGAAGAAAA  
CATCATCAACCTGAAATACAAAATCCGTGAAAACGCTGTTAAAAAATCAACATCGAAAACGAAATCC  
AGCAGCTGTCTAACAACGAACCGCGTAAAAACACCCTGCTGACCCTGAAAAAAAACCTGGAAAACCTG  
ATCAACAACCAGAAAAGAACAGCTGAAAACCTACCAGATCCTGCTGAAAACCTGAACGACGAAAACAA  
TTGA

>SAP11

ATGAGCCCGAAAAAGAAAGCAGCGATAAAAAACGCGATATCCCGAAAATCAACAAGAGCGAAGAGAA  
AAACAAGAAACAGAAAGAGGACATCAAACGCTTCTACACCATCCACAAAGAGTTCAAAGAATACAGCA  
TCGAGAAGAACAACGAGATCATCAAAATTCTGGAAAACCCGGAACCTGATGGAAATCCTGAAACAAAA  
GCCGAAGAGGAAACGAAAAACCTGAAAGAAGAAGGTAGCAGCAGCAAACAGCCGGATGATAGCAAAAA  
ATGA

>TENGU

ATGGATCAGGATGATGATATCGAAAATGTGATTACCCTGATCGAAACCAAAGAAAATCAGACCGAGCA  
GATTAAATCCAGTGTCAGGATCTGCTGCAGAAAGGTGAAAAAGATGCATGA

>mGFP6

ATGTTTCAGTAAAGGAGAAGAACTTTTCACTGGAGTTGTCCCAATTCTTGTTGAATTAGATGGTGATGT  
TAATGGGCACAAATTTTCTGTCTAGTGGAGAGGGTGAAGGTGATGCAACATACGGAAAACCTTACCCTTA  
AATTTATTTGCACTACTGGAAAACCTGTTCCATGGCCAACCCTGGTCACCACCCTGACCTACGGC  
GTGCAGTGCTTCTCCCGTTACCCTGATCATATGAAGCGGCACGACTTCTTCAAGAGCGCCATGCCTGA  
GGGATACGTGCAGGAGAGGACCATCTTCTTCAAGGACGACGGGAACCTACAAGACACGTGCTGAAGTCA  
AGTTTGAGGGAGACACCCTCGTCAACAGGATCGAGCTTAAGGGAATCGATTTCAGGAGGACGGAAAC  
ATCCTCGGCCACAAGTTGGAATACAACCTACAACCTCCACAACGTATACATCATGGCCGACAAGCAAAA  
GAACGGCATCAAAGCCAACCTTCAAGACCCGCCACAACATCGAAGACGGCGGCGTGCAACTCGCTGATC  
ATTATCAACAAAATACTCCAATTGGCGATGGCCCTGTCCTTTTACCAGACAACCATTACCTGTCCACA  
CAATCTGCCCTTTTCGAAAGATCCCAACGAAAAGAGAGACCACATGGTCCTTCTTGAGTTTGTAACAGC  
TGCTGGGATTACACATGGCATGGATGAACTATACAAATAA

>mGFP6-SAP54

ATGTTTCAGTAAAGGAGAAGAACTTTTCACTGGAGTTGTCCCAATTCTTGTTGAATTAGATGGTGATGT  
TAATGGGCACAAATTTTCTGTCTAGTGGAGAGGGTGAAGGTGATGCAACATACGGAAAACCTTACCCTTA  
AATTTATTTGCACTACTGGAAAACCTGTTCCATGGCCAACCCTGGTCACCACCCTGACCTACGGC  
GTGCAGTGCTTCTCCCGTTACCCTGATCATATGAAGCGGCACGACTTCTTCAAGAGCGCCATGCCTGA  
GGGATACGTGCAGGAGAGGACCATCTTCTTCAAGGACGACGGGAACCTACAAGACACGTGCTGAAGTCA  
AGTTTGAGGGAGACACCCTCGTCAACAGGATCGAGCTTAAGGGAATCGATTTCAGGAGGACGGAAAC  
ATCCTCGGCCACAAGTTGGAATACAACCTACAACCTCCACAACGTATACATCATGGCCGACAAGCAAAA  
GAACGGCATCAAAGCCAACCTTCAAGACCCGCCACAACATCGAAGACGGCGGCGTGCAACTCGCTGATC  
ATTATCAACAAAATACTCCAATTGGCGATGGCCCTGTCCTTTTACCAGACAACCATTACCTGTCCACA  
CAATCTGCCCTTTTCGAAAGATCCCAACGAAAAGAGAGACCACATGGTCCTTCTTGAGTTTGTAACAGC  
TGCTGGGATTACACATGGCATGGATGAACTATACAAACCCGCACCTGCTGCAGCTGCAGCTGCTTGCT  
CTAGAGCAATGGACAAAGACATCGCTTCTACCTCTAACAACAACCCGAACATCACCAACTACTCTATC  
GAAGAAAACATCATCAACCTGAAAATACAAAATCCGTGAAAACGCTGTTAAAAAATCAACATCGAAAA  
CGAAATCCAGCAGCTGTCTAACAACGAACCGCGTAAAAACACCCTGCTGACCCTGAAAAAAAACCTGG  
AAAACCTGATCAACAACCAGAAAAGAACAGCTGAAAACCTACCAGATCCTGCTGAAAACCTGAACGAC  
GAAAACAATTGA

>mGFP6-SAP11

ATGTTTCAGTAAAGGAGAAGAACTTTTCACTGGAGTTGTCCCAATTCTTGTTGAATTAGATGGTGATGT  
TAATGGGCACAAATTTTCTGTCAGTGGAGAGGGTGAAGGTGATGCAACATACGGAAACTTACCCTTA  
AATTTATTTGCACTACTGGAAACTACCTGTTCCATGGCCAACCCTGGTCACCACCCTGACCTACGGC  
GTGCAGTGCTTCTCCCGTTACCCTGATCATATGAAGCGGCACGACTTCTTCAAGAGCGCCATGCCTGA  
GGGATACGTGCAGGAGAGGACCATCTTCTTCAAGGACGACGGGAACTACAAGACACGTGCTGAAGTCA  
AGTTTGAGGGAGACACCCTCGTCAACAGGATCGAGCTTAAGGGAATCGATTTCAAGGAGGACGGAAAC  
ATCCTCGGCCACAAGTTGGAATACAACCTACAACCTCCACAACGTATACATCATGGCCGACAAGCAAAA  
GAACGGCATCAAAGCCAACCTTCAAGACCCGCCACAACATCGAAGACGGCGGCGTGCAACTCGCTGATC  
ATTATCAACAAAATACTCCAATTGGCGATGGCCCTGTCCTTTTACCAGACAACCATTACCTGTCCACA  
CAATCTGCCCTTTTCGAAAGATCCCAACGAAAAGAGAGACCACATGGTCCTTCTTGAGTTTGTAACAGC  
TGCTGGGATTACACATGGCATGGATGAACTATACAAACCCGCACCTGCTGCAGCTGCAGCTGCTTGCT  
CTAGAGCAATGAGCCCGAAAAAAGAAAGCAGCGATAAAAAACGCGATATCCCGAAAATCAACAAGAGC  
GAAGAGAAAAACAAGAAACAGAAAGAGGACATCAAACGCTTCTACACCATCCACAAAGAGTTCAAAGA  
ATACAGCATCGAGAAGAACAACGAGATCATCAAAATTCTGGAAAACCCGGAACCTGATGGAAATCCTGA  
AACAAAAAGCCGAAGAGGAAACGAAAAACCTGAAAGAAGAAGGTAGCAGCAGCAAACAGCCGGATGAT  
AGCAAAAAATGA

>mGFP6-TENGU

ATGTTTCAGTAAAGGAGAAGAACTTTTCACTGGAGTTGTCCCAATTCTTGTTGAATTAGATGGTGATGT  
TAATGGGCACAAATTTTCTGTCAGTGGAGAGGGTGAAGGTGATGCAACATACGGAAACTTACCCTTA  
AATTTATTTGCACTACTGGAAACTACCTGTTCCATGGCCAACCCTGGTCACCACCCTGACCTACGGC  
GTGCAGTGCTTCTCCCGTTACCCTGATCATATGAAGCGGCACGACTTCTTCAAGAGCGCCATGCCTGA  
GGGATACGTGCAGGAGAGGACCATCTTCTTCAAGGACGACGGGAACTACAAGACACGTGCTGAAGTCA  
AGTTTGAGGGAGACACCCTCGTCAACAGGATCGAGCTTAAGGGAATCGATTTCAAGGAGGACGGAAAC  
ATCCTCGGCCACAAGTTGGAATACAACCTACAACCTCCACAACGTATACATCATGGCCGACAAGCAAAA  
GAACGGCATCAAAGCCAACCTTCAAGACCCGCCACAACATCGAAGACGGCGGCGTGCAACTCGCTGATC  
ATTATCAACAAAATACTCCAATTGGCGATGGCCCTGTCCTTTTACCAGACAACCATTACCTGTCCACA  
CAATCTGCCCTTTTCGAAAGATCCCAACGAAAAGAGAGACCACATGGTCCTTCTTGAGTTTGTAACAGC  
TGCTGGGATTACACATGGCATGGATGAACTATACAAACCCGCACCTGCTGCAGCTGCAGCTGCTTGCT  
CTAGAGCAATGGATCAGGATGATGATATCGAAAATGTGATTACCCTGATCGAAACCAAAGAAAATCAG  
ACCGAGCAGATTAAAATCCAGTGTGAGGATCTGCTGCAGAAAGGTGAAAAAGATGCATGA
