# Supplementary material for: Studying the Function of Phytoplasma Effector Proteins Using a Chemical-Inducible Expression System in Transgenic Plants
Source: MDPI journal article supplement (doi:10.3390/ijms222413582), 2021-12-18
Supplement: s1 [file s1]

**Table S3:** Primers used for quantitative RT-PCR.

| <b>Primer name</b>  | <b>Primer sequence (5' to 3')</b>  | <b>Purpose of use</b>               |
|---------------------|------------------------------------|-------------------------------------|
| <b>RT-SAP54 fwd</b> | TAACAACGAACCGCGTAAAAACACCCTGCTG    | Quantification of SAP54 transcripts |
| <b>RT-SAP54 rev</b> | GTTTTTCGTCGTTTCAGGGTTTTTCAGCAGGATC |                                     |
| <b>RT-SAP11 fwd</b> | ATACAGCATCGAGAAGAACAACGAGATC       | Quantification of SAP11 transcripts |
| <b>RT-SAP11 rev</b> | CATTTTTTTGCTATCATCCGGCTGTTTGC      |                                     |
| <b>RT-TENGU fwd</b> | CAGGATGATGATATCGAAAATGTGATTAC      | Quantification of TENGU transcripts |
| <b>RT-TENGU rev</b> | GGATCCTGATCATGCATCTTTTTCAC         |                                     |
| <b>RT-GFP fwd</b>   | TACCAGACAACCATTACCTGTCCACACAATC    | Quantification of mGFP6 transcripts |
| <b>RT-GFP rev</b>   | GTTTCATCCATGCCATGTGTAATCCCAGCAG    |                                     |
| <b>RT-APT1 fwd</b>  | GATTGTTGAATGTGCTTGCG               | Quantification of APT1 transcripts  |
| <b>RT-APT1 rev</b>  | AGCATCAACACTCGATCCAA               |                                     |
| <b>RT-ACT2 fwd</b>  | TCGGTGGTTCCATTCTTGCT               | Quantification of ACT2 transcripts  |
| <b>RT-ACT2 rev</b>  | GCTTTTTTAAGCCTTTGATCTTGAGAG        |                                     |
