# Supplementary material for: Studying the Function of Phytoplasma Effector Proteins Using a Chemical-Inducible Expression System in Transgenic Plants
Source: MDPI journal article supplement (doi:10.3390/ijms222413582), 2021-12-18
Supplement: s1 [file s1]

**Table S2:** Sequence of the empty plasmid pGreen0229mod-35S that was used for generation of the constitutive expression vectors. pGreen0229mod-35S is based on the pGreen0229 plasmid carrying the CaMV-35S cassette with an altered multiple cloning site.

>pGreen0229mod-35S

```

TTTTTATCCCCGGAAGCCTGTGGATAGAGGGTAGTTATCCACGTGAAACCGCTAATGCCCCGCAAAGC
CTTGATTCACGGGGCTTTCCGGCCCGCTCCAAAACTATCCACGTGAAATCGCTAATCAGGGTACGTG
AAATCGCTAATCGGAGTACGTGAAATCGCTAATAAGGTCACGTGAAATCGCTAATCAAAAAGGCACGT
GAGAACGCTAATAGCCCTTTTCAGATCAACAGCTTGCAAACACCCCTCGCTCCGGCAAGTAGTTACAGC
AAGTAGTATGTTCAATTAGCTTTTCAATTATGAATATATATATCAATTATTGGTCGCCCTTGGCTTGT
GGACAATGCGCTACGCGCACCGGCTCCGCCCGTGGACAACCGCAAGCGGTTGCCACCGCTCGAGCGCC
AGCGCCTTTGCCCACAACCCGGCGGCCGGCCGCAACAGATCGTTTTATAAATTTTTTTTTTTGAAAA
GAAAAAGCCCGAAAGGCGGCAACCTCTCGGGCTTCTGGATTTCGATCCCCGGAATTAGATCTTGGA
GGATATATTGTGGTGTAACGTTATCAGCTTGCGTGCATGCCGGTCGATCTAGTAACATAGATGACACCGCGC
GCGATAATTTATCCTAGTTTGC GCGCTATATTTTGTCTTCTATCGCGTATTAAATGTATAATTGCGGG
ACTCTAATCAAAAAACCCATCTCATAAATAACGTCATGCATTACATGTTAATTATTACATGCTTAACG
TAATTCAACAGAAATTATATGATAATCATCGCAAGACCGGCAACAGGATTCAATCTTAAGAACTTTA
TTGCCAAATGTTTGAACGATCTGCTTGACTCTAGGGGTCATCAGATTTCCGTGACGGGCAGGACCGGA
CGGGGCGGCACCGGCAGGCTGAAGTCCAGCTGCCAGAAACCCACGTCATGCCAGTTCCCGTGCTTGAA
GCCGGCCGCCCGCAGCATGCCACGGGGGGCATATCCGAGCGCCTCGTGCGATGCGCACGCTCGGGTCGT
TGGGCAGCCCGATGACAGCGACACGCTCTTGAAGCCCTGTGCCTCCAGGGACTTCAGCAGGTGGGTG
TAGAGCGTGAGAGCCAGTCCCGTCCGCTGGTGGCGGGGGGAGACGTACACGTTGACTCGGCCGTCCA
GTCGTAGGCGTTGCGTGCCCTCCAGGGACCCGCGTAGGCGATGCCGGCGACCTCGCCGTCCACCTCGG
CGACGAGCCAGGGATAGCGCTCCCGCAGACGGACGAGGTGCTCCGTCCACTCCTGCGGTTCTGCGGC
TCGGTACGGAAGTTGACCGTGCTTGTCTGGATGTAGTGGTTGACGATGGTGACAGCCGCCGGCATGTC
CGCCTCGGTGGCACGGCGGATGTGCGCCGGGCGTCGTTCTGGGTCATGGTAGATCCCCCTCGATCGA
GTTGAGAGTGAATATGAGACTCTAATTGGATACCGAGGGGAATTTATGGAACGTCAGTGGAGCATTTT
TGACAAGAAATATTTGCTAGCTGATAGTGACCTTAGGCGACTTTTGAACGCGCAATAATGGTTTCTGA
CGTATGTGCTTAGCTCATTAACCTCCAGAAACCCGGCTGAGTGGCTCCTTCAACGTTGCGGTTCTGTC
AGTTCCAAACGTAAAACGGCTTGTCCCGCGTCATCGGCGGGGGTCATAACGTGACTCCCTTAATTCTC
ATGTATCGATAACATTAACGTTTACAATTTTCGCGCCATTTCGCCATTACAGGCTGCGCAACTGTTGGGAA
GGGCGATCGGTGCGGGCCTCTTCGCTATTACGCCAGCTGGCGAAAGGGGGATGTGCTGCAAGGCGATT
AAGTTGGGTAACGCCAGGGTTTTCCAGTCACGACGTTGTAAAACGACGGCCAGTGAATTGTAATACG
ACTCACTATAGGGCGAATTGGGTACCGGGCCCCCCTCGAGATCGTACCCCTACTCCAAAAATGTCAA
AGATACAGTCTCAGAAGACCAAAGGGCTATTGAGACTTTTCAACAAAGGGTAATTTTCGGGAAACCTCC
TCGGATTCCATTGCCAGCTATCTGTCACTTCATCGAAAGGACAGTAGAAAAGGAAGGTGGCTCCTAC
AAATGCCATCATTGCGATAAAGGAAAGGCTATCATTCAAGATGCCTCTGCCGACAGTGGTCCCAAAGA
TGGACCCCCACCCACGAGGAGCATCGTGGAAGAAAGAACGTTCCAACCACGTCTTCAAAGCAAGTGG
ATTGATGTGACATCTCCACTGACGTAAGGGATGACGCACAATCCCACTATCCTTCGCAAGACCTTCC
TCTATATAAGGAAGTTCAATTTCAATTTGGAGAGGACAGCCCAAGCTTTCTAGAGGATCCCCGGGGAGC
TCGAATTCGGTACGCTGAAATCACCAGTCTCTCTCTACAAATCTATCTCTCTATTTTCTCCATAAA
TAATGTGTGAGTAGTTTCCCGATAAGGGAAATTAGGGTTCTTATAGGGTTTCGCTCATGTGTTGAGCA
TATAAGAAACCTTAGTATGTATTTGTATTTGTAAATACTTCTATCAATAAAATTTCTAATTCCTAA
AACCAAAATCCAGTACTAAAATCCAGATCGATGCGGCCGCCACCGCGGTGGAGCTCCAGCTTTTGTTC
CCTTTAGTGAGGGTTAATTCCGAGCTTGGCGTAATCATGGTCATAGCTGTTTCCGTGTGTGAAATTGTT
ATCCGCTCACAATTCCACACAACATACGAGCCGGAAGCATAAAGTGTAAGCCTGGGGTGCTAATGA
GTGAGCTAACTCACATTAATTGCGTTGCGCTCACTGCCCGCTTTCAGTCGGGAAACCTGTCGTGCCA
GCTGCATTAATGAATCGGCCAACGCGCGGGGAGAGGCGGTTTGCATATTGGGCGCTCTTCCGCTTCCT
CGCTCACTGACTCGCTGCGCTCGGTGCTTCCGCTGCGGCGAGCGGTATCAGCTCACTCAAAGGCGGTA
ATACGGTTATCCACAGAATCAGGGGATAACGCAGGAAAGAACATGAAGGCCTTGACAGGATATATTGG
CGGGTAAACTAAGTCGCTGTATGTGTTTGTGTTGAGATCTCATGTGAGCAAAAGGCCAGCAAAAGGCCA
GGAACCGTAAAAAGGCCGCGTTGCTGGCGTTTTTCCATAGGCTCCGCCCCCTGACGAGCATCACAAA
AATCGACGCTCAAGTCAGAGGTGGCGAAACCCGACAGGACTATAAAGATACCAGGCGTTTCCCCCTGG
AAGCTCCCTCGTGCGCTCTCCTGTTCCGACCCTGCCGCTTACCGGATACCTGTCCGCCTTTCTCCCTT
CGGGAAGCGTGCGCTTTCTCATAGCTCACGCTGTAGGTATCTCAGTTCCGGTGTAGGTGCTTCGCTCC

```

AAGCTGGGCTGTGTGCACGAACCCCCGTTTCAGCCCGACCGCTGCGCCTTATCCGGTAACTATCGTCT  
TGAGTCCAACCCGGTAAGACACGACTTATCGCCACTGGCAGCAGCCACTGGTAACAGGATTAGCAGAG  
CGAGGTATGTAGGCGGTGCTACAGAGTTCTTGAAGTGGTGGCCTAACTACGGCTACACTAGAAGAACA  
GTATTTGGTATCTGCGCTCTGCTGAAGCCAGTTACCTTCGGAAGAAGAGTTGGTAGCTCTTGATCCGG  
CAAACAAACCACCGCTGGTAGCGGTGGTTTTTTTTGTTTTGCAAGCAGCAGATTACGCGCAGAAAAAAG  
GATCTCAAGAAGATCCTTTGATCTTTTCTACGGGGTCTGACGCTCAGTGGAACGAAAACACAGTTAA  
GGGATTTTGGTCATGAGATTATCAAAAAGGATCTTCACCTAGATCCTTTTAAATTAAAAATGAAGTTT  
TAAATCAATCTAAAGTATATATGTGTAACATTGGTCTAGTGATTAGAAAAACTCATCGAGCATCAAT  
GAAACTGCAATTTATTCATATCAGGATTATCAATACCATATTTTTGAAAAAGCCGTTTCTGTAATGAA  
GGAGAAAACCTACCGAGGCAGTTCCATAGGATGGCAAGATCCTGGTATCGGTCTGCGATTCCGACTCG  
TCCAACATCAATACAACCTATTAATTTCCCTCGTCAAAAAATAAGGTTATCAAGTGAGAAATCACCAT  
GAGTGACGACTGAATCCGGTGAGAATGGCAAAAGTTTATGCATTTCTTTCCAGACTTGTTCAACAGGC  
CAGCCATTACGCTCGTCATCAAAATCACTCGCATCAACCAAACCGTTATTCATTCGTGATTGCGCCTG  
AGCGAGACGAAATACGCGATCGCTGTTAAAAGGACAATTACAAACAGGAATCGAATGCAACCGGCGCA  
GGAACACTGCCAGCGCATCAACAATATTTTACCTGAATCAGGATATTCTTCTAATACCTGGAATGCT  
GTTTTCCCTGGGATCGCAGTGGTGAGTAACCATGCATCATCAGGAGTACGGATAAAATGCTTGATGGT  
CGGAAGAGGCATAAATTCGTCAGCCAGTTTAGTCTGACCATCTCATCTGTAACAACATTGGCAACGC  
TACCTTTGCCATGTTTCAGAAACAACCTCTGGCGCATCGGGCTTCCCATAACAATCGGTAGATTGTCGCA  
CCTGATTGCCCCGACATTATCGCGAGCCCATTTATACCCATATAAATCAGCATCCATGTTGGAATTTAA  
TCGCGGCCTTGAGCAAGACGTTTCCCGTTGAATATGGCTCATAACACCCCTTGTATTACTGTTTATGT  
AAGCAGACAGTTTTATTGTTTCATGATGATATATTTTTATCTTGTGCAATGTAACATCAGAGATTTTGA  
GACACAACGTGGCTTTGTTGAATAAATCGAACTTTTGCTGAGTTGAAGGATCAGATCACGCATCTTCC  
CGACAACGCAGACCGTTCCGTGGCAAAGCAAAAAGTTCAAAATCACCAACTGGTCCACCTACAACAAAG  
CTCTCATCAACCGTGGCTCCCTCACTTTCTGGCTGGATGATGGGGCGATTTCAGGCGATCCCCATCCAA  
CAGCCCGCCGTCGAGCGGGCT
